# Supplementary material for: Systematic examination of preprint platforms for use in the medical and biomedical sciences setting
Source: PubMed Central journal article supplement (PMC7778769; doi:10.1136/bmjopen-2020-041849), 2020-12-29
Supplement: bmjopen-2020-041849supp001.pdf [file bmjopen-2020-041849supp001.pdf]

**Supplementary Table 1: Reasons for excluded preprint platforms**

| <b>Name of Site</b>                                                   | <b>Reason for Exclusion</b>                     |
|-----------------------------------------------------------------------|-------------------------------------------------|
| Chemweb                                                               | Inactive                                        |
| Centre for Health Economics and Policy Analysis (CHEPA)               | Inactive                                        |
| ClinMed NetPrints                                                     | Inactive                                        |
| Cogprints                                                             | Inactive                                        |
| CSTC                                                                  | Inactive                                        |
| K-Theory Preprint Archives                                            | Inactive                                        |
| Mathematics Preprint Search System (MPRESS)                           | Inactive                                        |
| National Advisory Committee for Aeronautics (NACA)                    | Inactive                                        |
| Nature Precedings                                                     | Inactive                                        |
| The Winnower                                                          | Inactive                                        |
| Geometry Center's Preprints                                           | Inactive                                        |
| World Health Organisation Zika Open repository                        | Inactive                                        |
| Instant Math Preprints (Yale Mathematics Preprint Bulletin Board)     | Inactive                                        |
| Organisation Européenne pour la Recherche Nucléaire document platform | Repository                                      |
| Hyper Articles en Ligne (HAL)                                         | Repository                                      |
| ResearchGate                                                          | Repository                                      |
| White Rose Consortium e-Prints Repository                             | Repository                                      |
| Zenodo                                                                | Repository                                      |
| Organisation Européenne pour la Recherche Nucléaire Print             | Offline                                         |
| Fermilab                                                              | Offline                                         |
| Physics Information Exchange (PIE)                                    | Offline                                         |
| Radio Astronomy Preprints – RAPsheet                                  | Offline                                         |
| Space Telescope Preprints – STEPsheet                                 | Offline                                         |
| Advance: a SAGE preprints community                                   | Scope: Humanities and Social Sciences           |
| BodoArXiv                                                             | Scope: Medieval Studies                         |
| Cryptology ePrint Archive                                             | Scope: Cryptology                               |
| CORE repository                                                       | Scope: Humanities                               |
| EarthArXiv                                                            | Scope: Earth Sciences                           |
| EconStor                                                              | Scope: Economics and Business Studies           |
| ECSarXiv                                                              | Scope: Electrochemistry and solid state science |
| engrXiv                                                               | Scope: Engineering                              |
| E-LIS                                                                 | Scope: Library and Information Science          |
| Electronic Colloquium on Computational Complexity                     | Scope: Computer Science                         |
| Institute for Fiscal Studies (IFS) Working Papers                     | Scope: Economics                                |
| LawArxiv                                                              | Scope: Law                                      |
| LIS Scholarship Archive                                               | Scope: Library and Information Science          |
| LingBuzz                                                              | Scope: Linguistics                              |
| MediArXiv                                                             | Scope: Media, Film and Communication Studies    |
| Mathematical Physics Preprint Archive (mp_arc)                        | Scope: Mathematical Physics and Related Areas   |
| National Bureau of Economic Research (NBER) Working Papers            | Scope: Economics                                |
| Networked Computer Science Technical Reference Library (NCSTRL)       | Scope: Computer Science                         |
| Philsci Archive                                                       | Scope: Philosophy of Science                    |
| Munich Personal RePEc Archive (MPRA)                                  | Scope: Economics                                |
| Social Science Open Access Repository (SSOAR)                         | Scope: Social Sciences                          |
| Stanford Physics Information Retrieval System (SPIRES)                | Scope: Physics                                  |
| WorldBank's Policy Research Working Paper Series (PRWPs)              | Scope: Economics                                |
