# Supplementary material for: Systematic examination of preprint platforms for use in the medical and biomedical sciences setting
Source: PubMed Central journal article supplement (PMC7778769; doi:10.1136/bmjopen-2020-041849), 2020-12-29
Supplement: bmjopen-2020-041849supp004.pdf [file bmjopen-2020-041849supp004.pdf]

Supplementary Table 4: Screening, moderation, and permanence of content

| Preprint Server              | Stated not peer reviewed on manuscript record webpage (M) / general server webpages (S) | Advisory Board (A) / Includes Researchers (R) | Commitment to FAIR (Findable, Accessible, Interoperable and Reusable) principles / Data availability statement (DAS) | Screening checks performed between submitting and posting (stating where this process involves active researchers)                                                                        | Permanence of content (P) / Reasons for retraction (R) / Web presence of removed content (W)                                                                         | Mechanisms to report concerns about posted content                                                          | Sustainability of the service (S) / Preservation of content (P)                                                                                                                                         |
|------------------------------|-----------------------------------------------------------------------------------------|-----------------------------------------------|----------------------------------------------------------------------------------------------------------------------|-------------------------------------------------------------------------------------------------------------------------------------------------------------------------------------------|----------------------------------------------------------------------------------------------------------------------------------------------------------------------|-------------------------------------------------------------------------------------------------------------|---------------------------------------------------------------------------------------------------------------------------------------------------------------------------------------------------------|
| <b>OSF Communities</b>       |                                                                                         |                                               |                                                                                                                      |                                                                                                                                                                                           |                                                                                                                                                                      |                                                                                                             |                                                                                                                                                                                                         |
| AfricArxiv [1] – Verified    | M: No<br>S: Yes                                                                         | A: Yes<br>R: Yes                              | Yes, endorses, stated on website<br><br>DAS: Not requested or required                                               | 'moderated submission check for quality standard, good scientific practices, open science principles', including data/code availability                                                   | P: Permanent with some removal options in extraneous circumstances<br>R: Plagiarism, false or inaccurate content<br>W: Basic information remains on a tombstone page | Email administrator; helpdesk support from COS (Centre for Open Science)                                    | S: COS receive external financial support (e.g. grant, individual); operators report no sources of income, staffed on voluntary basis<br>P: COS Preservation Fund to maintain read access for 50+ years |
| AgriXiv [2] – Verified       | M: No<br>S: No                                                                          | A: Yes<br>R: Yes                              | Yes<br><br>DAS: Unknown                                                                                              | No information                                                                                                                                                                            | P: Permanent with some removal options in extraneous circumstances<br>R: Plagiarism, false or inaccurate content<br>W: Basic information remains on a tombstone page | Email administrator; helpdesk support from COS                                                              | S: COS receive external financial support (e.g. grant, individual); operators report Open Access India plans to raise funds<br>P: COS Preservation Fund to maintain read access for 50+ years           |
| Arabixiv [3] – Verified      | M: No<br>S: No                                                                          | A: Yes<br>A: Unknown                          | Yes<br><br>DAS: Unknown                                                                                              | Arabixiv editors check for: ensuring it is academic research                                                                                                                              | P: Permanent with some removal options in extraneous circumstances<br>R: Plagiarism, false or inaccurate content<br>W: Basic information remains on a tombstone page | Email administrator; helpdesk support from COS; Readers encouraged to post concerns publicly as new article | S: COS receive external financial support (e.g. grant, individual); no further information to report from operators<br>P: COS Preservation Fund to maintain read access for 50+ years                   |
| EcoEvoRxiv [4] – Verified    | M: No<br>S: Yes                                                                         | A: Yes<br>R: Yes                              | Yes<br><br>DAS: Unknown                                                                                              | Steering committee member (including active researchers) checks for: competing interests, plagiarism, misconduct or integrity checks, ethical and legal compliance, funder acknowledgment | P: Permanent with some removal options in extraneous circumstances<br>R: Plagiarism, false or inaccurate content<br>W: Basic information remains on a tombstone page | Email administrator; helpdesk support from COS                                                              | S: COS receive external financial support (e.g. grant, individual); no further information to report from operators<br>P: COS Preservation Fund to maintain read access for 50+ years                   |
| FocUS Archive [5] – Verified | M: No<br>S: No                                                                          | A: Yes<br>R: Yes                              | Yes<br><br>DAS: Unknown                                                                                              | There is a moderation process, no further information known                                                                                                                               | P: Permanent with some removal options in extraneous circumstances<br>R: Plagiarism, false or inaccurate content<br>W: Basic information remains                     | Email administrator; helpdesk support from COS                                                              | S: COS receive external financial support (e.g. grant, individual); nothing to report from operators<br>P: COS Preservation Fund to maintain read access for 50+                                        |

|                                                    |                 |                          |                                           |                                                                                                                                                                                                            | on a tombstone page                                                                                                                                                  |                                                                                     | years                                                                                                                                                                                  |
|----------------------------------------------------|-----------------|--------------------------|-------------------------------------------|------------------------------------------------------------------------------------------------------------------------------------------------------------------------------------------------------------|----------------------------------------------------------------------------------------------------------------------------------------------------------------------|-------------------------------------------------------------------------------------|----------------------------------------------------------------------------------------------------------------------------------------------------------------------------------------|
| Frenxiv [6] – Verified                             | M: No<br>S: No  | A: Yes<br>R: Yes         | Yes<br><br>DAS: Unknown                   | Editorial-advisory members (including active researchers) check for: competing interests, plagiarism, misconduct or integrity checks, authors are genuine, ethical and legal compliance, data availability | P: Permanent with some removal options in extraneous circumstances<br>R: Plagiarism, false or inaccurate content<br>W: Basic information remains on a tombstone page | Email administrator; helpdesk support from COS                                      | S: COS receive external financial support (e.g. grant, individual); nothing to report from operators<br>P: COS Preservation Fund to maintain read access for 50+ years                 |
| INA-Rxiv [7] – Verified                            | M: No<br>S: Yes | A: Yes<br>R: Yes         | Yes<br><br>DAS: Unknown                   | Unknown                                                                                                                                                                                                    | P: Permanent with some removal options in extraneous circumstances<br>R: Plagiarism, false or inaccurate content<br>W: Basic information remains on a tombstone page | Email administrator; helpdesk support from COS                                      | S: COS receive external financial support (e.g. grant, individual); operators endorse users to donate to COS<br>P: COS Preservation Fund to maintain read access for 50+ years         |
| MarXiv [8] – note: no longer on the OSF – Verified | M: No<br>S: Yes | A: Yes<br>R: Yes         | Yes<br><br>DAS: Unknown                   | The MarXiv team check for: plagiarism, misconduct or integrity checks, ethical and legal compliance                                                                                                        | P: Permanent with some removal options in extraneous circumstances<br>R: Plagiarism, false or inaccurate content<br>W: Basic information remains on a tombstone page | Email administrator; helpdesk support from COS                                      | S: COS receive external financial support (e.g. grant, individual); service moving to another host<br>P: COS Preservation Fund to maintain read access for 50+ years                   |
| MetaArXiv [9] – Verified                           | M: No<br>S: No  | A: Yes<br>R: Yes         | Yes<br><br>DAS: Not requested or required | BITSS staff check for: relevance of material, author name matches submitter                                                                                                                                | P: Permanent with some removal options in extraneous circumstances<br>R: Plagiarism, false or inaccurate content<br>W: Basic information remains on a tombstone page | Email administrator; helpdesk support from COS; Community moderation via commenting | S: COS receive external financial support (e.g. grant, individual); operation supported by BITSS funders and revenue<br>P: COS Preservation Fund to maintain read access for 50+ years |
| MindRxiv [10] – Verified                           | M: No<br>S: Yes | A: Yes<br>R: Yes         | Yes<br><br>DAS: Not requested or required | Science Director at Mind & Life (including active researchers) checks for: relevance of material, ensuring it is academic research                                                                         | P: Permanent with some removal options in extraneous circumstances<br>R: Plagiarism, false or inaccurate content<br>W: Basic information remains on a tombstone page | Email administrator; helpdesk support from COS                                      | S: COS receive external financial support (e.g. grant, individual); nothing to report from operators<br>P: COS Preservation Fund to maintain read access for 50+ years                 |
| NutriXiv [11] – Verified                           | M: No<br>S: No  | A: Unknown<br>R: Unknown | Yes<br><br>DAS: Unknown                   | No information                                                                                                                                                                                             | P: Permanent with some removal options in extraneous circumstances<br>R: Plagiarism, false or inaccurate content<br>W: Basic information remains on a tombstone page | Email administrator; helpdesk support from COS                                      | S: COS receive external financial support (e.g. grant, individual); nothing to report from operators<br>P: COS Preservation Fund to maintain read access for 50+ years                 |
| OSF Preprints [12] –                               | M: No           | A: Yes                   | Yes                                       | OSF staff members run                                                                                                                                                                                      | P: Permanent with some                                                                                                                                               | Email administrator;                                                                | S: COS receive external financial                                                                                                                                                      |

|                                             |                  |                  |                                       |                                                                                                                                                                           |                                                                                                                                                                      |                                                |                                                                                                                                                                                          |
|---------------------------------------------|------------------|------------------|---------------------------------------|---------------------------------------------------------------------------------------------------------------------------------------------------------------------------|----------------------------------------------------------------------------------------------------------------------------------------------------------------------|------------------------------------------------|------------------------------------------------------------------------------------------------------------------------------------------------------------------------------------------|
| Verified                                    | S: Yes           | R: Yes           | DAS: Not requested or required        | automated checks for spam                                                                                                                                                 | removal options in extraneous circumstances<br>R: Plagiarism, false or inaccurate content<br>W: Basic information remains on a tombstone page                        | helpdesk support from COS                      | support (e.g. grant, individual)<br>P: COS Preservation Fund to maintain read access for 50+ years                                                                                       |
| PaleorXiv [13] – Verified                   | M: No<br>S: Yes  | A: Yes<br>R: Yes | Yes<br>DAS: Not requested or required | A moderator from the PaleoRxiv steering committee ( <i>including active researchers</i> ) checks for: plagiarism, relevance of material, ensuring it is academic research | P: Permanent with some removal options in extraneous circumstances<br>R: Plagiarism, false or inaccurate content<br>W: Basic information remains on a tombstone page | Email administrator; helpdesk support from COS | S: COS receive external financial support (e.g. grant, individual); nothing to report from operators<br>P: COS Preservation Fund to maintain read access for 50+ years                   |
| PsyArXiv [14] – Verified                    | M: No<br>S: Yes  | A: Yes<br>R: Yes | Yes<br>DAS: Not requested or required | Moderation team checks for: ethical and legal compliance, relevance of material, copyright violations, spam                                                               | P: Permanent with some removal options in extraneous circumstances<br>R: Plagiarism, false or inaccurate content<br>W: Basic information remains on a tombstone page | Email administrator; helpdesk support from COS | S: COS receive external financial support (e.g. grant, individual); nothing to report from operators<br>P: COS Preservation Fund to maintain read access for 50+ years                   |
| SocArxiv [15] – Verified                    | M: No<br>S: Yes  | A: Yes<br>R: Yes | Yes<br>DAS: Unknown                   | There is a moderation process, no further information known                                                                                                               | P: Permanent with some removal options in extraneous circumstances<br>R: Plagiarism, false or inaccurate content<br>W: Basic information remains on a tombstone page | Email administrator; helpdesk support from COS | S: COS receive external financial support (e.g. grant, individual); nothing to report from operators<br>P: COS Preservation Fund to maintain read access for 50+ years                   |
| SportRxiv [16] – Verified                   | M: No<br>S: Yes  | A: Yes<br>R: Yes | Yes<br>DAS: Not requested or required | SportRxiv editors ( <i>including active researchers</i> ) check for: basic scientific standards, authors are genuine, all authors provide permission to post              | P: Permanent with some removal options in extraneous circumstances<br>R: W: Basic information remains on a tombstone page                                            | Email administrator; helpdesk support from COS | S: COS receive external financial support (e.g. grant, individual); operators report membership fees help offset costs<br>P: COS Preservation Fund to maintain read access for 50+ years |
| Thesis Commons [17] – Verified              | M: No<br>S: No   | A: Yes<br>R: Yes | Yes<br>DAS: Not requested or required | There is no moderation process beyond that for OSF Preprints (OSF staff check for spam)                                                                                   | P: Permanent with some removal options in extraneous circumstances<br>R: Plagiarism, false or inaccurate content<br>W: Basic information remains on a tombstone page | Email administrator; helpdesk support from COS | S: COS receive external financial support (e.g. grant, individual); nothing to report from operators<br>P: COS Preservation Fund to maintain read access for 50+ years                   |
| <b>Open Research Central infrastructure</b> |                  |                  |                                       |                                                                                                                                                                           |                                                                                                                                                                      |                                                |                                                                                                                                                                                          |
| AAS Open Research [18] – Verified           | M: Yes<br>S: Yes | A: Yes<br>R: Yes | Yes, compliant, stated on website     | F1000's in-house editorial team check for: competing interest                                                                                                             | P: Permanent with some removal options in                                                                                                                            | Community moderation via                       | S: Article processing charges, covered by funding agency for                                                                                                                             |

|                                               |                  |                                                  |                                                                                                         |                                                                                                                                                                                                                                                                |                                                                                                                                                                                  |                                                                                         |                                                                                                                                                                                                                       |
|-----------------------------------------------|------------------|--------------------------------------------------|---------------------------------------------------------------------------------------------------------|----------------------------------------------------------------------------------------------------------------------------------------------------------------------------------------------------------------------------------------------------------------|----------------------------------------------------------------------------------------------------------------------------------------------------------------------------------|-----------------------------------------------------------------------------------------|-----------------------------------------------------------------------------------------------------------------------------------------------------------------------------------------------------------------------|
| AMRC Open Research [19] – <i>Verified</i>     | M: Yes<br>S: Yes | A: Not yet<br>R: Still finalising advisory board | DAS: Required                                                                                           | declaration, plagiarism, authors are genuine and at least one eligible for platform, authors provide permission to post, ethical and legal compliance, funder acknowledgment, clinical trial registration, data/code availability, minimum reporting standards | extraneous circumstances<br>R: Contravention of copyright, plagiarism, false or inaccurate content, ethical and legal issues<br>W: Basic information remains on a tombstone page | commenting                                                                              | AAS, Gates, HRB, MNI and Wellcome (MNI - limited to one article per lab per year)<br>P: Preprints permanently archived in Portico                                                                                     |
| Gates Open Research [20] – <i>Verified</i>    | M: Yes<br>S: Yes | A: Yes<br>R: Yes                                 |                                                                                                         |                                                                                                                                                                                                                                                                |                                                                                                                                                                                  |                                                                                         |                                                                                                                                                                                                                       |
| HRB Open Research [21] – <i>Verified</i>      | M: Yes<br>S: Yes | A: Yes<br>R: Yes                                 |                                                                                                         |                                                                                                                                                                                                                                                                |                                                                                                                                                                                  |                                                                                         |                                                                                                                                                                                                                       |
| MNI Open Research [22] – <i>Verified</i>      | M: Yes<br>S: Yes | A: Not yet<br>R: Not applicable                  |                                                                                                         |                                                                                                                                                                                                                                                                |                                                                                                                                                                                  |                                                                                         |                                                                                                                                                                                                                       |
| Wellcome Open Research [23] – <i>Verified</i> | M: Yes<br>S: Yes | A: Yes<br>R: Yes                                 |                                                                                                         |                                                                                                                                                                                                                                                                |                                                                                                                                                                                  |                                                                                         |                                                                                                                                                                                                                       |
| <b>Others</b>                                 |                  |                                                  |                                                                                                         |                                                                                                                                                                                                                                                                |                                                                                                                                                                                  |                                                                                         |                                                                                                                                                                                                                       |
| arXiv [24] – <i>Verified</i>                  | M: No<br>S: Yes  | A: Yes<br>R: Yes                                 | None as yet<br><br>DAS: Not requested or required                                                       | arXiv moderators ( <i>including active researchers</i> ) check for: plagiarism, misconduct or integrity checks, authors are genuine, ethical and legal compliance, relevance of material                                                                       | P: Permanent with no removal options (as long as archive exists)<br>R: None<br>W: Not applicable                                                                                 | Social media or direct with authors (except copyright violations or significant issues) | S: External financial support (grants and membership program: libraries, research labs, philanthropy, government funding)<br>P: Persistent access through mirror sites, no external preservation services used as yet |
| Authorea [25] – <i>Verified</i>               | M: No<br>S: Yes  | A: No<br>R: Not applicable (no advisory board)   | Yes, in process of becoming compliant, without stating on website<br><br>DAS: Not requested or required | Submissions are checked for spam                                                                                                                                                                                                                               | P: Content maybe removed by operator/owner only<br>R: Policy not yet in place<br>W: Not applicable (at this time)                                                                | Email administrator                                                                     | S: Other business model not based on direct preprinting charges or associated journal (acquisition and investment from Atypion, part of Wiley)<br>P: Preprints permanently archived in Portico                        |
| bioRxiv [26] – <i>Verified</i>                | M: Yes<br>S: Yes | A: Yes<br>R: Yes                                 | None as yet<br><br>DAS: Not requested or required                                                       | bioRxiv staff and scientific affiliates ( <i>including active researchers</i> ) check for: plagiarism, misconduct or integrity checks, ethical and legal compliance, clinical trial registration, submission is within scope and no danger to human            | P: Permanent with withdrawal options and (rare) removal in extraneous circumstances<br>R: Removal: Legal or biohazard reasons; Withdrawal: Plagiarism, false or inaccurate       | Email administrator                                                                     | S: Internal (Cold Spring Harbor Laboratory) and external financial support (multiyear grant funding from Chan Zuckerberg Initiative)<br>P: Preprints permanently archived in Portico                                  |

|                                              |                  |                  |                                                                                  |                                                                                                                                                                                                                                                                                                   |                                                                                                                                                                                                                |                                                                          |                                                                                                                                                              |
|----------------------------------------------|------------------|------------------|----------------------------------------------------------------------------------|---------------------------------------------------------------------------------------------------------------------------------------------------------------------------------------------------------------------------------------------------------------------------------------------------|----------------------------------------------------------------------------------------------------------------------------------------------------------------------------------------------------------------|--------------------------------------------------------------------------|--------------------------------------------------------------------------------------------------------------------------------------------------------------|
|                                              |                  |                  |                                                                                  | health                                                                                                                                                                                                                                                                                            | content, ethical and legal issues, co-author(s) did not consent to posting<br>W: Withdrawn articles remain visible; For removed articles, basic information remains on a tombstone page                        |                                                                          |                                                                                                                                                              |
| Cell Press Sneak Peek [27] – <i>Verified</i> | M: Yes<br>S: Yes | A: Yes<br>R: Yes | Unknown                                                                          | No information                                                                                                                                                                                                                                                                                    | P: Unknown<br>R: Unknown<br>W: Unknown                                                                                                                                                                         | Unknown                                                                  | S: Unknown<br>P: Unknown                                                                                                                                     |
| ChemRxiv [28]                                | M: Yes<br>S: Yes | A: Yes<br>R: Yes | Yes, compliant, without stating on website<br><br>DAS: Not requested or required | PhD-level chemists ( <i>including active researchers</i> ) check for: competing interests declared, plagiarism, misconduct or integrity checks, authors are genuine, all authors provide permission to post, ethical and legal compliance, funder acknowledgment, external data/code availability | P: Permanent with some removal options in extraneous circumstances<br>R: Contravention of copyright, plagiarism, ethical and legal issues<br>W: Basic information remains on a tombstone page                  | Email administrator, or contact ethics departments of governing partners | S: Nothing to report from server<br>P: Agreement to dark archive content with TIB (Leibniz Information Centre for Science and Technology University Library) |
| ChinaXiv [29]                                | M: No<br>S: No   | A: Yes<br>R: Yes | Unknown<br><br>DAS: Not requested or required                                    | Project team and scientists ( <i>including active researchers</i> ) check for: plagiarism, misconduct or integrity checks, authors are genuine                                                                                                                                                    | P: Permanent with no removal options<br>R: Contravention of copyright, plagiarism, false or inaccurate content, ethical and legal issues<br>W: Basic information remains on a tombstone page                   | None                                                                     | S: Nothing to report from server<br>P: Long term preservation in local                                                                                       |
| ESSOAr [30] – <i>Verified</i>                | M: Yes<br>S: Yes | A: Yes<br>R: Yes | Yes, without stating on website<br><br>DAS: Not requested or required            | Editorial board members ( <i>including active researchers</i> ) check for: plagiarism, misconduct or integrity checks, authors are genuine, all authors provide permission to post, submission is scholarly and within scope                                                                      | P: Permanent with some removal options in extraneous circumstances<br>R: Copyright infringement or other ethical or legal issues the Advisory Board deems critical<br>W: Unknown                               | Email administrator                                                      | S: Internal financial support (investment from Wiley and AGU)<br>P: On roadmap: preprints to be permanently archived in Portico                              |
| F1000 Research [31] – <i>Verified</i>        | M: Yes<br>S: Yes | A: Yes<br>R: Yes | Yes, compliant, stated on website<br><br>DAS: Required                           | F1000's in-house editorial team check for: competing interest declaration, plagiarism, authors are genuine and at least one eligible for platform, authors provide permission to post, ethical and legal compliance, funder acknowledgment, clinical                                              | P: Permanent with some removal options in extraneous circumstances<br>R: Contravention of copyright, false or inaccurate content, ethical and legal issues<br>W: Basic information remains on a tombstone page | Email administrator                                                      | S: Nothing to report from server<br>P: Preprints permanently archived in Portico                                                                             |

|                                                                       |                  |                                             |                                                     |                                                                                                                                                                                                                                                                              |                                                                                                                                                                                                                                                                                                                                                                    |                                     |                                                                                                                                                                     |
|-----------------------------------------------------------------------|------------------|---------------------------------------------|-----------------------------------------------------|------------------------------------------------------------------------------------------------------------------------------------------------------------------------------------------------------------------------------------------------------------------------------|--------------------------------------------------------------------------------------------------------------------------------------------------------------------------------------------------------------------------------------------------------------------------------------------------------------------------------------------------------------------|-------------------------------------|---------------------------------------------------------------------------------------------------------------------------------------------------------------------|
|                                                                       |                  |                                             |                                                     | trial registration, data/code availability, minimum reporting standards, relevance of material                                                                                                                                                                               |                                                                                                                                                                                                                                                                                                                                                                    |                                     |                                                                                                                                                                     |
| JMIR Preprints [32]                                                   | M: No<br>S: Yes  | A: Unknown<br>R: Unknown                    | Unknown                                             | Unknown                                                                                                                                                                                                                                                                      | P: Unknown<br>R: Unknown<br>W: Unknown                                                                                                                                                                                                                                                                                                                             | Unknown                             | S: Unknown<br>P: Unknown                                                                                                                                            |
| medRxiv [33] –<br><i>Verified</i>                                     | M: Yes<br>S: Yes | A: In formation<br>(January 2020)<br>R: Yes | None as yet<br>DAS: Required                        | Submission is checked for: competing interests declared, plagiarism, misconduct or integrity checks, minimal reporting standards, ethical and legal compliance, clinical trial registration, funder acknowledgment, submission is within scope and no danger to human health | P: Permanent with withdrawal options and (rare) removal in extraneous circumstances<br>R: Removal: Legal or biohazard reasons; Withdrawal: Plagiarism, false or inaccurate content, ethical and legal issues, co-author(s) did not consent to posting<br>W: Withdrawn articles remain visible; For removed articles, basic information remains on a tombstone page | Unknown                             | S: Supported by CSHL<br>P: Preprints permanently archived in Portico                                                                                                |
| MitoFit Preprint Archives [34]                                        | M: Yes<br>S: Yes | A: Yes<br>R: Yes                            | Yes, endorses, stated on website<br>DAS: Encouraged | Scientific Advisory Board members ( <i>including active researchers</i> ) check for: competing interests declared, misconduct or integrity checks, authors are genuine, funder acknowledgment                                                                                | P: Permanent with some removal options in extraneous circumstances<br>R: Plagiarism, ethical and legal issues, no appropriate declaration of conflicts of interest<br>W: Basic information remains on a tombstone page                                                                                                                                             | Community moderation via commenting | S: Other business model not based on direct preprinting charges or associated journal (maintained by MitoFit DOI Data Center)<br>P: Backup kept in secondary server |
| NeuroImage: Clinical -<br><i>First Look</i> [35] –<br><i>Verified</i> | M: Yes<br>S: Yes | A: Unknown<br>R: Unknown                    | Unknown                                             | No information                                                                                                                                                                                                                                                               | P: Unknown<br>R: Unknown<br>W: Unknown                                                                                                                                                                                                                                                                                                                             | Unknown                             | S: Unknown<br>P: Unknown                                                                                                                                            |
| PeerJ Preprints [36] –<br><i>Verified</i>                             | M: Yes<br>S: Yes | A: Yes<br>R: Yes                            | None<br>DAS: Encouraged                             | PeerJ staff check for: competing interests declared, misconduct or integrity checks, ethical and legal compliance, funder acknowledgment                                                                                                                                     | P: Permanent with some removal options in extraneous circumstances<br>R: False or inaccurate content, additional reasons not stated<br>W: Basic information remains on a tombstone page                                                                                                                                                                            | Email administrator                 | S: Supported by associated journal publishing (PeerJ)<br>P: Preprints permanently archived in Portico and EuropePMC                                                 |
| Preprints with The Lancet [37] –<br><i>Verified</i>                   | M: Yes<br>S: Yes | A: Unknown<br>R: Unknown                    | Unknown                                             | SSRN staff and a Lancet editor check for: competing interests                                                                                                                                                                                                                | P: Unknown<br>R: Unknown                                                                                                                                                                                                                                                                                                                                           | Unknown                             | S: Unknown<br>P: Unknown                                                                                                                                            |

|                                            |                  |                                 |                                                                                 |                                                                                                                                                                                                                                                                                                                         |                                                                                                                                                                                                                                                                                                   |                     |                                                                                                                                                                                           |
|--------------------------------------------|------------------|---------------------------------|---------------------------------------------------------------------------------|-------------------------------------------------------------------------------------------------------------------------------------------------------------------------------------------------------------------------------------------------------------------------------------------------------------------------|---------------------------------------------------------------------------------------------------------------------------------------------------------------------------------------------------------------------------------------------------------------------------------------------------|---------------------|-------------------------------------------------------------------------------------------------------------------------------------------------------------------------------------------|
|                                            |                  |                                 |                                                                                 | declared, ethical and legal compliance, funder acknowledgment, clinical trial registration, relevance of material                                                                                                                                                                                                       | W: Unknown                                                                                                                                                                                                                                                                                        |                     |                                                                                                                                                                                           |
| Preprints.org [38]                         | M: Yes<br>S: Yes | A: Yes<br>R: Yes                | None as yet<br><br>DAS: Encouraged                                              | Preprints staff and advisory board members ( <i>including active researchers</i> ) check for: plagiarism (as needed), authors are genuine, ethical and legal compliance, basic scientific content, data/code availability                                                                                               | P: Permanent with some removal options in extraneous circumstances<br>R: Contravention of copyright, plagiarism, false or inaccurate content, ethical and legal issues, misconduct<br>W: Basic information remains on a tombstone page if DOI has been issued, otherwise no web presence retained | Email administrator | S: Supported by associated journal publishing (MDPI)<br>P: Currently no long-term preservation strategy                                                                                   |
| Research Square [39]<br>– <i>Verified</i>  | M: Yes<br>S: Yes | A: Not yet<br>R: Not applicable | None as yet<br><br>DAS: Not requested or required                               | In-house editorial team checks for: competing interests declared, plagiarism (only for submissions to BMC journals), ethical and legal compliance, funder acknowledgment, clinical trial registration, relevance of material, basic scientific content, language, potential for harm                                    | P: Permanent with some removal options in extraneous circumstances<br>R: Contravention of copyright, ethical and legal issues<br>W: Basic information remains on a tombstone page                                                                                                                 | Email administrator | S: Other business model not based on direct preprinting charges or associated journal publishing (publishing services by Research Square)<br>P: Preprints permanently archived in Portico |
| SciELO Preprints [40]<br>– <i>Verified</i> | M: No<br>S: No   | A: Yes<br>R: Yes                | Yes, endorses, without stating on website<br><br>DAS: Not requested or required | SciELO editors ( <i>including active researchers</i> ) will check for: competing interests declared, plagiarism, misconduct and integrity checks, ethical and legal compliance, authors are genuine, all authors provide permission to post, clinical trial registration, funder acknowledgment, data/code availability | P: Permanent with some removal options in extraneous circumstances<br>R: Contravention of copyright, plagiarism, false or inaccurate content, ethical and legal issues<br>W: No web presence retained                                                                                             | Email administrator | S: Internal financial support (SciELO program)<br>P: Plan to use LOCKSS-compatible preservation strategy [once full operation launched]                                                   |
| SSRN [41] – <i>Verified</i>                | M: No<br>S: No   | A: Yes<br>R: Yes                | Unknown                                                                         | SSRN staff check for relevance of material                                                                                                                                                                                                                                                                              | P: Content maybe removed by author (or operator/owner)<br>R: Contravention of copyright, plagiarism, false or inaccurate content, ethical and legal issues<br>W: Unknown                                                                                                                          | Email administrator | S: Unknown<br>P: Unknown                                                                                                                                                                  |
| Surgery Open Science                       | M: No            | A: Unknown                      | Unknown                                                                         | Unknown                                                                                                                                                                                                                                                                                                                 | P: Unknown                                                                                                                                                                                                                                                                                        | Unknown             | S: Unknown                                                                                                                                                                                |

|                                 |                  |                  |                                                                                                                   |                                                                                                                                                                                                                           |                                                                                                                                                                                                                      |                                                               |                                                                                                                                                                              |
|---------------------------------|------------------|------------------|-------------------------------------------------------------------------------------------------------------------|---------------------------------------------------------------------------------------------------------------------------------------------------------------------------------------------------------------------------|----------------------------------------------------------------------------------------------------------------------------------------------------------------------------------------------------------------------|---------------------------------------------------------------|------------------------------------------------------------------------------------------------------------------------------------------------------------------------------|
| - First Look [42] –<br>Verified | S: No            | R: Unknown       |                                                                                                                   |                                                                                                                                                                                                                           | R: Unknown<br>W: Unknown                                                                                                                                                                                             |                                                               | P: Unknown                                                                                                                                                                   |
| Therapoid [43] –<br>Verified    | M: No<br>S: No   | A: Yes<br>R: Yes | None as yet<br><br>DAS: Not requested or<br>required                                                              | There is no pre-moderation of<br>submissions; any checks are<br>performed by site users<br>(including active researchers)<br>after posting                                                                                | P: Permanent with some<br>removal options in<br>extraneous circumstances<br>R: Contravention of copyright,<br>plagiarism, false or<br>inaccurate content, ethical<br>and legal issues<br>W: No web presence retained | Not yet in place:<br>expect community<br>moderation via forum | S: Unknown<br>P: All content is preserved – no<br>further information reported<br>by server                                                                                  |
| ViXra [44]                      | M: Yes<br>S: Yes | A: Yes<br>R: Yes | Mostly compliant,<br>without endorsing,<br>without stating on<br>website<br><br>DAS: Not requested or<br>required | Administrators do not perform<br>formal screening checks but<br>reject submissions in response to<br>issues relating to: plagiarism,<br>misconduct and integrity checks,<br>ethical and legal compliance,<br>format (PDF) | P: Content maybe removed by<br>author (or<br>operator/owner)<br>R: Contravention of copyright,<br>plagiarism, false or<br>inaccurate content, ethical<br>and legal issues<br>W: No web presence retained             | Email administrator                                           | S: Sustainable low-cost web<br>hosting service secured,<br>previously run on donations<br>P: Long-term archiving provided<br>by mirror site and cloud<br>storage of database |

## Preprint platform websites

1. AfricArxiv <https://info.africarxiv.org/>
2. AgriXiv <https://agrixiv.org>
3. Arabixiv <https://arabixiv.org/>
4. EcoEvoRxiv <https://ecoevorxiv.org>
5. FocUS Archive <https://osf.io/preprints/focusarchive/>
6. Frenxiv <https://frenxiv.org>
7. INA-Rxiv <https://osf.io/preprints/inarxiv>
8. MarXiv <https://marxiv.org>
9. MetaArXiv <https://osf.io/preprints/metaarxiv/>
10. MindRxiv <https://mindrxiv.org>
11. NutriXiv <https://osf.io/preprints/nutrixiv>
12. OSF Preprints <https://osf.io/preprints/>
13. PaleorXiv <https://paleorxiv.org>
14. PsyArXiv <https://psyarxiv.com>
15. SocArXiv <https://osf.io/preprints/socarxiv>
16. SportRxiv <https://osf.io/preprints/sportrxiv>
17. Thesis Commons <https://thesiscommons.org>
18. AAS Open Research <https://aasopenresearch.org/>
19. AMRC Open Research <https://amrcopenresearch.org/>
20. Gates Open Research <https://gatesopenresearch.org/>
21. HRB Open Research <https://hrbopenresearch.org/>
22. MNI Open Research <https://mniopenresearch.org/>
23. Wellcome Open Research <https://wellcomeopenresearch.org/>
24. arXiv <https://arxiv.org>
25. Authorea <https://www.authorea.com>
26. bioRxiv <https://www.biorxiv.org/>
27. Cell Press Sneak Peek [https://papers.ssrn.com/sol3/JelJOUR\\_results.cfm?form\\_name=journalBrowse&journal\\_id=3184889](https://papers.ssrn.com/sol3/JelJOUR_results.cfm?form_name=journalBrowse&journal_id=3184889)
28. ChemRxiv <https://chemrxiv.org>
29. ChinaXiv <http://chinaxiv.org>
30. ESSOAr <https://www.essoar.org>
31. F1000 Research <https://www.essoar.org>
32. JMIR Preprints <https://preprints.jmir.org/>
33. medRxiv <https://www.medrxiv.org>
34. MitoFit Preprint Archives [https://www.mitofit.org/index.php/MitoFit\\_Preprint\\_Archives](https://www.mitofit.org/index.php/MitoFit_Preprint_Archives)
35. NeuroImage: Clinical – First Look [https://papers.ssrn.com/sol3/JELJOUR\\_Results.cfm?form\\_name=journalBrowse&journal\\_id=3178959](https://papers.ssrn.com/sol3/JELJOUR_Results.cfm?form_name=journalBrowse&journal_id=3178959)
36. PeerJ Preprints <https://peerj.com/preprints/>
37. Preprints with The Lancet [https://papers.ssrn.com/sol3/JELJOUR\\_Results.cfm?form\\_name=journalBrowse&journal\\_id=3184962](https://papers.ssrn.com/sol3/JELJOUR_Results.cfm?form_name=journalBrowse&journal_id=3184962)
38. Preprints.org <https://www.preprints.org/>
39. Research Square <https://www.researchsquare.com>
40. SciELO Preprints <https://preprints.scielo.org/index.php/scielo>
41. SSRN <https://www.ssrn.com>
42. Surgery Open Science – First Look [https://papers.ssrn.com/sol3/JelJOUR\\_results.cfm?form\\_name=journalBrowse&journal\\_id=3303309](https://papers.ssrn.com/sol3/JelJOUR_results.cfm?form_name=journalBrowse&journal_id=3303309)
43. Therapoid <https://therapoid.net>
44. ViXra <http://vixra.org>
