# Supplementary material for: Systematic examination of preprint platforms for use in the medical and biomedical sciences setting
Source: PubMed Central journal article supplement (PMC7778769; doi:10.1136/bmjopen-2020-041849), 2020-12-29
Supplement: bmjopen-2020-041849supp005.pdf [file bmjopen-2020-041849supp005.pdf]

Supplementary Table 5: Usage metrics &amp; other features

| Preprint Server                                       | Usage metrics on abstract page |                     |                                           |                    |            |                                                         | Other features                             |               |                                                                   |                                         |
|-------------------------------------------------------|--------------------------------|---------------------|-------------------------------------------|--------------------|------------|---------------------------------------------------------|--------------------------------------------|---------------|-------------------------------------------------------------------|-----------------------------------------|
| OSF Communities                                       | Number of views                | Number of downloads | Number of citations (e.g. Google Scholar) | Number of comments | Altmetrics | Social media interactions (from platform not Altmetric) | Commenting (including annotation plug-ins) | Onsite search | Alerts (e.g. RSS (Really Simple Syndication) feeds, email alerts) | Other                                   |
| AfricArxiv [1] – Verified                             |                                | ⊗                   |                                           |                    |            |                                                         | ⊗                                          | ⊗             |                                                                   |                                         |
| AgriXiv [2] – Verified                                |                                | ⊗                   |                                           |                    |            |                                                         | ⊗                                          | ⊗             |                                                                   |                                         |
| Arabixiv [3] – Verified                               |                                | ⊗                   |                                           |                    |            |                                                         | ⊗                                          | ⊗             |                                                                   |                                         |
| EcoEvoRxiv [4] – Verified                             |                                | ⊗                   |                                           |                    |            |                                                         |                                            | ⊗             |                                                                   |                                         |
| FocUS Archive [5] – Verified                          |                                | ⊗                   |                                           |                    |            |                                                         |                                            | ⊗             |                                                                   |                                         |
| Frenxiv [6] – Verified                                |                                | ⊗                   |                                           |                    |            |                                                         | ⊗                                          | ⊗             |                                                                   |                                         |
| INA-Rxiv [7] – Verified                               |                                | ⊗                   |                                           |                    |            |                                                         | ⊗                                          | ⊗             |                                                                   |                                         |
| MarXiv [8]<br>– note: no longer on the OSF – Verified |                                | ⊗                   |                                           |                    |            |                                                         | ⊗                                          | ⊗             |                                                                   |                                         |
| MetaArXiv [9] – Verified                              |                                | ⊗                   |                                           |                    |            |                                                         | ⊗                                          | ⊗             |                                                                   |                                         |
| MindRxiv [10] – Verified                              |                                | ⊗                   |                                           |                    |            |                                                         | ⊗                                          | ⊗             |                                                                   |                                         |
| NutriXiv [11] – Verified                              |                                | ⊗                   |                                           |                    |            |                                                         | ⊗                                          | ⊗             |                                                                   |                                         |
| OSF Preprints [12] – Verified                         |                                | ⊗                   |                                           |                    |            |                                                         | ⊗                                          | ⊗             |                                                                   |                                         |
| PaleorXiv [13] – Verified                             |                                | ⊗                   |                                           |                    |            |                                                         | ⊗                                          | ⊗             |                                                                   |                                         |
| PsyArXiv [14] – Verified                              |                                | ⊗                   |                                           |                    |            |                                                         | ⊗                                          | ⊗             |                                                                   |                                         |
| SocArxiv [15] – Verified                              |                                | ⊗                   |                                           |                    |            |                                                         | ⊗                                          | ⊗             | ⊗                                                                 |                                         |
| SportRxiv [16] – Verified                             |                                | ⊗                   |                                           |                    |            |                                                         | ⊗                                          | ⊗             |                                                                   |                                         |
| Thesis Commons [17] – Verified                        |                                | ⊗                   |                                           |                    |            |                                                         | ⊗                                          | ⊗             |                                                                   |                                         |
| <b>Open Research Central infrastructure</b>           |                                |                     |                                           |                    |            |                                                         |                                            |               |                                                                   |                                         |
| AAS Open Research [18] – Verified                     | ⊗                              | ⊗                   | ⊗                                         |                    | ⊗          |                                                         | ⊗                                          | ⊗             |                                                                   | 'Link to Google Scholar citations, Blog |

|                                               |   |   |   |   |   |   |   |   |   |                                                                                                                            |
|-----------------------------------------------|---|---|---|---|---|---|---|---|---|----------------------------------------------------------------------------------------------------------------------------|
|                                               |   |   |   |   |   |   |   |   |   | and gateways'                                                                                                              |
| AMRC Open Research [19] – <i>Verified</i>     | ⊗ | ⊗ | ⊗ |   | ⊗ |   | ⊗ | ⊗ |   | 'Link to Google Scholar citations'                                                                                         |
| Gates Open Research [20] – <i>Verified</i>    | ⊗ | ⊗ | ⊗ |   | ⊗ |   | ⊗ | ⊗ |   | 'Link to Google Scholar citations, Gateways'                                                                               |
| HRB Open Research [21] – <i>Verified</i>      | ⊗ | ⊗ | ⊗ |   | ⊗ |   | ⊗ | ⊗ |   | 'Link to Google Scholar citations, Blog'                                                                                   |
| MNI Open Research [22] – <i>Verified</i>      | ⊗ | ⊗ | ⊗ |   | ⊗ |   | ⊗ | ⊗ |   | 'Link to Google Scholar citations'                                                                                         |
| Wellcome Open Research [23] – <i>Verified</i> | ⊗ | ⊗ | ⊗ |   | ⊗ |   | ⊗ | ⊗ |   | 'Link to Google Scholar citations, Blog and gateways'                                                                      |
| <b>Others</b>                                 |   |   |   |   |   |   |   |   |   |                                                                                                                            |
| arXiv [24] – <i>Verified</i>                  |   |   |   |   |   |   |   | ⊗ | ⊗ |                                                                                                                            |
| Authorea [25] – <i>Verified</i>               | ⊗ | ⊗ |   |   |   | ⊗ | ⊗ |   |   | 'Forking (copying an article that may or may not be authored by you), follow the article'                                  |
| bioRxiv [26] – <i>Verified</i>                | ⊗ | ⊗ |   | ⊗ | ⊗ | ⊗ | ⊗ | ⊗ | ⊗ | 'Channels, PRereview reviews linked, PreLights blog linked, Pingbacks to blog, PCI, biOverlay and Twitter thread embedded' |
| Cell Press Sneak Peek [27] – <i>Verified</i>  | ⊗ | ⊗ |   |   |   |   |   |   |   | Unknown 'other'                                                                                                            |
| ChemRxiv [28]                                 | ⊗ | ⊗ | ⊗ |   | ⊗ |   |   |   |   | Unknown 'other'                                                                                                            |
| ChinaXiv [29]                                 | ⊗ | ⊗ |   |   |   |   | ⊗ |   | ⊗ | 'News, Author blacklist'                                                                                                   |
| ESSOAr [30] – <i>Verified</i>                 |   | ⊗ |   |   | ⊗ |   |   | ⊗ | ⊗ | 'Plaudit, QR code, bookmarks, reference management tools'                                                                  |
| F1000 Research [31] – <i>Verified</i>         | ⊗ | ⊗ | ⊗ |   | ⊗ |   | ⊗ | ⊗ | ⊗ | 'Link to Google Scholar citations'                                                                                         |
| JMIR Preprints [32]                           |   |   |   |   |   | ⊗ | ⊗ | ⊗ |   |                                                                                                                            |
| medRxiv [33] – <i>Verified</i>                | ⊗ | ⊗ |   | ⊗ | ⊗ | ⊗ | ⊗ | ⊗ | ⊗ |                                                                                                                            |
| MitoFit Preprint Archives [34]                |   |   |   |   |   |   |   |   |   | None                                                                                                                       |

|                                                                 |                       |   |  |   |   |                                                |                                                |                                                |                       |                                                                   |
|-----------------------------------------------------------------|-----------------------|---|--|---|---|------------------------------------------------|------------------------------------------------|------------------------------------------------|-----------------------|-------------------------------------------------------------------|
| NeuroImage: Clinical - <i>First Look</i> [35] – <i>Verified</i> | ⊗                     | ⊗ |  |   |   |                                                |                                                |                                                |                       | Unknown 'other'                                                   |
| PeerJ Preprints [36] – <i>Verified</i>                          | ⊗                     | ⊗ |  | ⊗ |   | ⊗                                              | ⊗                                              | ⊗                                              | ⊗                     |                                                                   |
| Preprints with The Lancet [37] – <i>Verified</i>                | ⊗                     | ⊗ |  |   |   |                                                |                                                |                                                |                       | Unknown 'other'                                                   |
| Preprints.org [38]                                              | ⊗                     | ⊗ |  | ⊗ | ⊗ |                                                | ⊗                                              | ⊗                                              | ⊗                     | Embedded bookmark tabs for reading and reference management tools |
| Research Square [39] – <i>Verified</i>                          | ⊗                     | ⊗ |  | ⊗ | ⊗ |                                                | ⊗                                              | ⊗                                              |                       | Email alerts with comments                                        |
| SciELO Preprints [40] – <i>Verified</i>                         | ⊗                     | ⊗ |  |   | ⊗ | ⊗<br>(when regular operation launches in 2020) | ⊗<br>(when regular operation launches in 2020) | ⊗<br>(when regular operation launches in 2020) |                       |                                                                   |
| SSRN [41] – <i>Verified</i>                                     | ⊗                     | ⊗ |  |   |   |                                                |                                                |                                                |                       | Plum metrics                                                      |
| Surgery Open Science - <i>First Look</i> [42] – <i>Verified</i> | ⊗                     | ⊗ |  |   |   |                                                |                                                | ⊗                                              | ⊗ (SSRN subscription) |                                                                   |
| Therapoid [43] – <i>Verified</i>                                | 'metrics coming soon' |   |  |   |   |                                                | ⊗                                              | ⊗                                              | ⊗                     | 'Blockchain technology being implemented'                         |
| ViXra [44]                                                      | ⊗                     |   |  |   |   |                                                | ⊗                                              |                                                | ⊗                     |                                                                   |

## Preprint platform websites

1. AfricArxiv <https://info.africarxiv.org/>
2. AgriXiv <https://agrxiv.org>
3. Arabixiv <https://arabixiv.org/>
4. EcoEvoRxiv <https://ecoevorxiv.org>
5. FocUS Archive <https://osf.io/preprints/focusarchive/>
6. Frenxiv <https://frenxiv.org>
7. INA-Rxiv <https://osf.io/preprints/inarxiv>
8. MarXiv <https://marxiv.org>
9. MetaArXiv <https://osf.io/preprints/metaarxiv/>
10. MindRxiv <https://mindrxiv.org>
11. NutriXiv <https://osf.io/preprints/nutrixiv>
12. OSF Preprints <https://osf.io/preprints/>
13. PaleorXiv <https://paleorxiv.org>
14. PsyArXiv <https://psyarxiv.com>
15. SocArXiv <https://osf.io/preprints/socarxiv>
16. SportRxiv <https://osf.io/preprints/sportrxiv>
17. Thesis Commons <https://thesiscommons.org>
18. AAS Open Research <https://aasopenresearch.org/>
19. AMRC Open Research <https://amrcopenresearch.org/>
20. Gates Open Research <https://gatesopenresearch.org/>
21. HRB Open Research <https://hrbopenresearch.org/>
22. MNI Open Research <https://mniopenresearch.org/>
23. Wellcome Open Research <https://wellcomeopenresearch.org/>
24. arXiv <https://arxiv.org>
25. Authorea <https://www.authorea.com>
26. bioRxiv <https://www.biorxiv.org/>
27. Cell Press Sneak Peek [https://papers.ssrn.com/sol3/JelJour\\_results.cfm?form\\_name=journalBrowse&journal\\_id=3184889](https://papers.ssrn.com/sol3/JelJour_results.cfm?form_name=journalBrowse&journal_id=3184889)
28. ChemRxiv <https://chemrxiv.org>
29. ChinaXiv <http://chinaxiv.org>
30. ESSOAr <https://www.essoar.org>
31. F1000 Research <https://www.essoar.org>
32. JMIR Preprints <https://preprints.imir.org/>
33. medRxiv <https://www.medrxiv.org>
34. MitoFit Preprint Archives [https://www.mitofit.org/index.php/MitoFit\\_Preprint\\_Archives](https://www.mitofit.org/index.php/MitoFit_Preprint_Archives)
35. NeuroImage: Clinical – First Look [https://papers.ssrn.com/sol3/JELJOUR\\_Results.cfm?form\\_name=journalBrowse&journal\\_id=3178959](https://papers.ssrn.com/sol3/JELJOUR_Results.cfm?form_name=journalBrowse&journal_id=3178959)
36. PeerJ Preprints <https://peerj.com/preprints/>
37. Preprints with The Lancet [https://papers.ssrn.com/sol3/JELJOUR\\_Results.cfm?form\\_name=journalBrowse&journal\\_id=3184962](https://papers.ssrn.com/sol3/JELJOUR_Results.cfm?form_name=journalBrowse&journal_id=3184962)
38. Preprints.org <https://www.preprints.org/>
39. Research Square <https://www.researchsquare.com>
40. SciELO Preprints <https://preprints.scielo.org/index.php/scielo>
41. SSRN <https://www.ssrn.com>
42. Surgery Open Science – First Look [https://papers.ssrn.com/sol3/JelJour\\_results.cfm?form\\_name=journalBrowse&journal\\_id=3303309](https://papers.ssrn.com/sol3/JelJour_results.cfm?form_name=journalBrowse&journal_id=3303309)
43. Therapoid <https://therapoid.net>
44. ViXra <http://vixra.org>
