# Supplementary material for: Systematic examination of preprint platforms for use in the medical and biomedical sciences setting
Source: PubMed Central journal article supplement (PMC7778769; doi:10.1136/bmjopen-2020-041849), 2020-12-29
Supplement: bmjopen-2020-041849supp006.pdf [file bmjopen-2020-041849supp006.pdf]

Table 5: Metadata contents

| Preprint Server              | Title                                    | DOI or identifier | Publication or deposition date | Author name(s) | Author affiliation(s) | Funder acknowledgment(s) | Subject category | License | Abstract | Full-text content | References | Relational link to journal publication version (where it exists) | Other |
|------------------------------|------------------------------------------|-------------------|--------------------------------|----------------|-----------------------|--------------------------|------------------|---------|----------|-------------------|------------|------------------------------------------------------------------|-------|
| <b>OSF Communities</b>       |                                          |                   |                                |                |                       |                          |                  |         |          |                   |            |                                                                  |       |
|                              | AfricArxiv [1] –<br><i>Verified</i>      | ⊗                 | ⊗                              | ⊗              | ⊗                     | ⊗                        | ⊗                | ⊗       | ⊗        |                   |            | ⊗                                                                |       |
|                              | AgriXiv [2] –<br><i>Verified</i>         | ⊗                 | ⊗                              | ⊗              | ⊗                     |                          | ⊗                | ⊗       | ⊗        |                   |            | ⊗                                                                |       |
|                              | Arabixiv [3] –<br><i>Verified</i>        | ⊗                 | ⊗                              | ⊗              | ⊗                     |                          | ⊗                | ⊗       | ⊗        |                   |            | ⊗                                                                |       |
|                              | EcoEvoRxiv [4] –<br><i>Verified</i>      | ⊗                 | ⊗                              | ⊗              | ⊗                     |                          | ⊗                | ⊗       | ⊗        |                   |            |                                                                  |       |
|                              | FocUS Archive [5] –<br><i>Verified</i>   | ⊗                 | ⊗                              | ⊗              | ⊗                     |                          | ⊗                | ⊗       | ⊗        |                   |            | ⊗                                                                |       |
|                              | Frenxiv [6] –<br><i>Verified</i>         | ⊗                 | ⊗                              | ⊗              | ⊗                     |                          | ⊗                | ⊗       | ⊗        |                   |            | ⊗                                                                |       |
|                              | INA-Rxiv [7] –<br><i>Verified</i>        | ⊗                 | ⊗                              | ⊗              | ⊗                     |                          | ⊗                | ⊗       | ⊗        |                   |            | ⊗                                                                |       |
|                              | MarXiv [8] –<br><i>Verified</i>          | ⊗                 | ⊗                              | ⊗              | ⊗                     |                          | ⊗                | ⊗       | ⊗        |                   |            | ⊗                                                                |       |
|                              | MetaArXiv [9] –<br><i>Verified</i>       | ⊗                 | ⊗                              | ⊗              | ⊗                     |                          | ⊗                | ⊗       | ⊗        |                   |            | ⊗                                                                |       |
|                              | MindRxiv [10] –<br><i>Verified</i>       | ⊗                 | ⊗                              | ⊗              | ⊗                     |                          | ⊗                | ⊗       | ⊗        |                   |            | ⊗                                                                |       |
|                              | NutriXiv [11] –<br><i>Verified</i>       | ⊗                 | ⊗                              | ⊗              | ⊗                     |                          |                  |         | ⊗        |                   |            |                                                                  |       |
|                              | OSF Preprints [12] –<br><i>Verified</i>  | ⊗                 | ⊗                              | ⊗              | ⊗                     |                          | ⊗                | ⊗       | ⊗        |                   |            | ⊗                                                                |       |
|                              | PaleorXiv [13] –<br><i>Verified</i>      | ⊗                 | ⊗                              | ⊗              | ⊗                     |                          | ⊗                | ⊗       | ⊗        |                   |            | ⊗                                                                |       |
|                              | PsyArXiv [14] –<br><i>Verified</i>       | ⊗                 | ⊗                              | ⊗              | ⊗                     |                          | ⊗                | ⊗       | ⊗        |                   |            | ⊗                                                                |       |
|                              | SocArxiv [15] –<br><i>Verified</i>       | ⊗                 | ⊗                              | ⊗              | ⊗                     |                          | ⊗                | ⊗       | ⊗        |                   |            | ⊗                                                                |       |
|                              | SportRxiv [16] –<br><i>Verified</i>      | ⊗                 | ⊗                              | ⊗              | ⊗                     |                          | ⊗                | ⊗       | ⊗        |                   |            | ⊗                                                                |       |
|                              | Thesis Commons [17] –<br><i>Verified</i> | ⊗                 | ⊗                              | ⊗              | ⊗                     |                          | ⊗                | ⊗       | ⊗        |                   |            | ⊗                                                                |       |
| <b>Open Research Central</b> |                                          |                   |                                |                |                       |                          |                  |         |          |                   |            |                                                                  |       |

|                                                    |   |   |   |   |   |   |   |   |   |   |   |   |                                                                                                                                 |
|----------------------------------------------------|---|---|---|---|---|---|---|---|---|---|---|---|---------------------------------------------------------------------------------------------------------------------------------|
| <b>Infrastructure</b>                              |   |   |   |   |   |   |   |   |   |   |   |   |                                                                                                                                 |
| AAS Open Research [18] – Verified                  | ⊗ | ⊗ | ⊗ | ⊗ | ⊗ | ⊗ | ⊗ |   | ⊗ | ⊗ |   |   | Competing interests, Referee (name, affiliation, report), Commenter (name, affiliation, comment text), Study type, Article type |
| AMRC Open Research [19] – Verified                 |   |   |   |   |   |   |   |   |   |   |   |   |                                                                                                                                 |
| Gates Open Research [20] – Verified                |   |   |   |   |   |   |   |   |   |   |   |   |                                                                                                                                 |
| HRB Open Research [21] – Verified                  |   |   |   |   |   |   |   |   |   |   |   |   |                                                                                                                                 |
| MNI Open Research [22] – Verified                  |   |   |   |   |   |   |   |   |   |   |   |   |                                                                                                                                 |
| Wellcome Open Research [23] – Verified             |   |   |   |   |   |   |   |   |   |   |   |   |                                                                                                                                 |
| <b>Others</b>                                      |   |   |   |   |   |   |   |   |   |   |   |   |                                                                                                                                 |
| arXiv [24] – Verified                              | ⊗ | ⊗ | ⊗ | ⊗ |   |   |   |   | ⊗ |   |   | ⊗ |                                                                                                                                 |
| Authorea [25] – Verified                           | ⊗ | ⊗ | ⊗ | ⊗ | ⊗ |   | ⊗ |   | ⊗ | ⊗ |   |   | Keywords                                                                                                                        |
| bioRxiv [26] – Verified                            | ⊗ | ⊗ | ⊗ | ⊗ | ⊗ |   | ⊗ | ⊗ | ⊗ | ⊗ | ⊗ | ⊗ |                                                                                                                                 |
| Cell Press Sneak Peek <sup>b</sup> [27] – Verified |   |   |   |   |   |   |   |   |   |   |   |   | No information                                                                                                                  |
| ChemRxiv [28]                                      | ⊗ | ⊗ | ⊗ | ⊗ | ⊗ | ⊗ | ⊗ | ⊗ | ⊗ | ⊗ | ⊗ |   |                                                                                                                                 |
| ChinaXiv [29]                                      | ⊗ | ⊗ | ⊗ | ⊗ |   |   | ⊗ |   | ⊗ |   |   |   |                                                                                                                                 |
| ESSOAr [30] – Verified                             | ⊗ | ⊗ | ⊗ | ⊗ | ⊗ | ⊗ | ⊗ | ⊗ | ⊗ |   |   | ⊗ | ORCID, keywords                                                                                                                 |
| F1000 Research [31] – Verified                     | ⊗ | ⊗ | ⊗ | ⊗ | ⊗ | ⊗ | ⊗ |   | ⊗ | ⊗ |   |   | Competing interests, Article is a Faculty Review (yes/no), Referee (name, affiliation,                                          |

|                                                                |   |   |   |   |   |   |   |   |   |   |   |   | report), Commenter (name, affiliation, comment text), Study type, Article type |
|----------------------------------------------------------------|---|---|---|---|---|---|---|---|---|---|---|---|--------------------------------------------------------------------------------|
| JMIR Preprints [32]                                            | ⊗ | ⊗ | ⊗ | ⊗ |   |   |   | ⊗ | ⊗ |   |   |   | Journal currently submitted to                                                 |
| medRxiv [33] – Verified                                        | ⊗ | ⊗ | ⊗ | ⊗ | ⊗ | ⊗ | ⊗ | ⊗ | ⊗ |   | ⊗ | ⊗ |                                                                                |
| MitoFit Preprint Archives [34]                                 | ⊗ | ⊗ | ⊗ | ⊗ | ⊗ | ⊗ | ⊗ | ⊗ | ⊗ |   |   |   | ORCID if provided, Language, Version                                           |
| NeuroImage: Clinical - First Look <sup>b</sup> [35] – Verified |   |   |   |   |   |   |   |   |   |   |   |   | No information                                                                 |
| PeerJ Preprints [36] – Verified                                | ⊗ | ⊗ | ⊗ | ⊗ | ⊗ | ⊗ | ⊗ | ⊗ | ⊗ |   |   | ⊗ |                                                                                |
| Preprints with The Lancet <sup>b</sup> [37] – Verified         |   |   |   |   |   |   |   |   |   |   |   |   | No information                                                                 |
| Preprints.org [38]                                             | ⊗ | ⊗ | ⊗ | ⊗ |   |   |   | ⊗ | ⊗ |   |   | ⊗ |                                                                                |
| Research Square [39] – Verified                                | ⊗ | ⊗ | ⊗ | ⊗ | ⊗ | ⊗ | ⊗ | ⊗ | ⊗ | ⊗ | ⊗ | ⊗ |                                                                                |
| SciELO Preprints [40] – Verified                               | ⊗ |   | ⊗ | ⊗ | ⊗ |   | ⊗ | ⊗ | ⊗ |   |   |   | Language                                                                       |
| SSRN [41] – Verified                                           | ⊗ | ⊗ | ⊗ | ⊗ |   |   |   |   | ⊗ |   | ⊗ |   |                                                                                |
| Surgery Open Science – First Look <sup>b</sup> [42] – Verified |   |   |   |   |   |   |   |   |   |   |   |   | No information                                                                 |
| Therapoid [43] – Verified                                      | ⊗ | ⊗ | ⊗ | ⊗ |   |   | ⊗ |   | ⊗ |   |   |   | “Anything else the author provides”                                            |
| ViXra [44]                                                     | ⊗ | ⊗ | ⊗ | ⊗ |   |   |   |   | ⊗ |   |   |   |                                                                                |

|  |  |  |  |  |  |  |  |  |  |  |  |  |  |  |
|--|--|--|--|--|--|--|--|--|--|--|--|--|--|--|
|  |  |  |  |  |  |  |  |  |  |  |  |  |  |  |
|--|--|--|--|--|--|--|--|--|--|--|--|--|--|--|

## Preprint platform websites

1. AfricArxiv <https://info.africarxiv.org/>
2. AgriXiv <https://agrxiv.org>
3. Arabixiv <https://arabixiv.org/>
4. EcoEvoRxiv <https://ecoevorxiv.org>
5. FocUS Archive <https://osf.io/preprints/focusarchive/>
6. Frenxiv <https://frenxiv.org>
7. INA-Rxiv <https://osf.io/preprints/inarxiv>
8. MarXiv <https://marxiv.org>
9. MetaArXiv <https://osf.io/preprints/metaarxiv/>
10. MindRxiv <https://mindrxiv.org>
11. NutriXiv <https://osf.io/preprints/nutrixiv>
12. OSF Preprints <https://osf.io/preprints/>
13. PaleorXiv <https://paleorxiv.org>
14. PsyArXiv <https://psyarxiv.com>
15. SocArXiv <https://osf.io/preprints/socarxiv>
16. SportRxiv <https://osf.io/preprints/sportrxiv>
17. Thesis Commons <https://thesiscommons.org>
18. AAS Open Research <https://aasopenresearch.org/>
19. AMRC Open Research <https://amrcopenresearch.org/>
20. Gates Open Research <https://gatesopenresearch.org/>
21. HRB Open Research <https://hrbopenresearch.org/>
22. MNI Open Research <https://mniopenresearch.org/>
23. Wellcome Open Research <https://wellcomeopenresearch.org/>
24. arXiv <https://arxiv.org>
25. Authorea <https://www.authorea.com>
26. bioRxiv <https://www.biorxiv.org/>
27. Cell Press Sneak Peek [https://papers.ssrn.com/sol3/JELJOUR\\_results.cfm?form\\_name=journalBrowse&journal\\_id=3184889](https://papers.ssrn.com/sol3/JELJOUR_results.cfm?form_name=journalBrowse&journal_id=3184889)
28. ChemRxiv <https://chemrxiv.org>
29. ChinaXiv <http://chinaxiv.org>
30. ESSOAr <https://www.essoar.org>
31. F1000 Research <https://www.essoar.org>
32. JMIR Preprints <https://preprints.jmir.org/>
33. medRxiv <https://www.medrxiv.org>
34. MitoFit Preprint Archives [https://www.mitofit.org/index.php/MitoFit\\_Preprint\\_Archives](https://www.mitofit.org/index.php/MitoFit_Preprint_Archives)
35. NeuroImage: Clinical – First Look [https://papers.ssrn.com/sol3/JELJOUR\\_Results.cfm?form\\_name=journalBrowse&journal\\_id=3178959](https://papers.ssrn.com/sol3/JELJOUR_Results.cfm?form_name=journalBrowse&journal_id=3178959)
36. PeerJ Preprints <https://peerj.com/preprints/>
37. Preprints with The Lancet [https://papers.ssrn.com/sol3/JELJOUR\\_Results.cfm?form\\_name=journalBrowse&journal\\_id=3184962](https://papers.ssrn.com/sol3/JELJOUR_Results.cfm?form_name=journalBrowse&journal_id=3184962)
38. Preprints.org <https://www.preprints.org/>
39. Research Square <https://www.researchsquare.com>
40. SciELO Preprints <https://preprints.scielo.org/index.php/scielo>
41. SSRN <https://www.ssrn.com>
42. Surgery Open Science – First Look [https://papers.ssrn.com/sol3/JELJOUR\\_results.cfm?form\\_name=journalBrowse&journal\\_id=3303309](https://papers.ssrn.com/sol3/JELJOUR_results.cfm?form_name=journalBrowse&journal_id=3303309)
43. Therapoid <https://therapoid.net>
44. ViXra <http://vixra.org>
